# Supplementary material for: Portrait of Candida albicans Adherence Regulators
Source: PLoS Pathog. 2012 Feb 16;8(2):e1002525. doi: 10.1371/journal.ppat.1002525 (PMC3280983; doi:10.1371/journal.ppat.1002525)
Supplement: Table S1 — Complete adherence measurements for mutant and complemented strains. Adherence determinations were made with a Fluxion flow cell, and are listed as mean and standard deviation. (XLS) [file ppat.1002525.s003.xls]

## Sheet: Supplemental Table 1A
Supplemental Table	Relative adherence of all TF mutants tested
ORF	Gene name	Strain(s) Tested	MT/WT	Stdev	p-value
19.2260	-	CJN854	0.657143	0.121891	0.0981
19.4670	CAS5	CJN432, CJN433	0.302526	0.167622	0.0137444
19.6680	FGR27	CJN419, CJN422	0.296968	0.0122545	0.0313422
19.1007	-	CJN609	0.818182	0.453441	0.686322
19.1032	SKO1	JMR104	0.832	0.205273	0.415
19.1035	WAR1	DSY3429 -1-2	0.530612	0.0605327	0.0237044
19.1069	RPN4	HZY66	2.12121	1.09467	0.312809
19.10708		RLS143	2.32759	1.69558	0.436549
19.1135	CAS1	CJN523, VIC1038,	clumping cells
19.1178	-	CJN866	0.795918	0.366894	0.618198
19.1187	CPH2	CJN524	1.12	0.0759699	0.194758
19.1217		JL41-8	1.578	0.974037	0.650533
19.1219	-	RLS22	1.826	0.873387	0.751964
19.1253		SFY5	0.790196	0.188189	0.3065
19.1255	ZCF5	CJN592	0.880519	0.197359	0.5325
19.1259	-	RLS21	1.311	0.551471	0.727523
19.1275	GAT1	SFY11	0.647059	0.213947	0.209125
19.1314		SFY19,-2	0.721622	0.101769	0.1195
19.1358	GCN4	CJN913	0.821429	0.222685	0.4162
19.1476	-	JMR090	0.933	0.206744	0.746
19.1496	-	CJN922	Filamentous
19.1497	ZCF6	CJN582	clumping cells
19.1499	CTF1	RLS9	2.061	0.224468	0.0324342
19.1533	-	GA15-2	1.644	0.437793	0.275053
19.1565	-	CJN941	1.3121	0.172772	0.158046
19.1576	-	RLS20	0.911	0.348619	0.615188
19.1577		SFY4,-2	0.313725	0.0539075	0.0159373
19.1589	-	CJN932	0.732484	0.641562	0.604967
19.1623	CAP1	CJN608	0.785714	0.739742	0.156852
19.166	ASG1	DSY1762	clumping cells
19.1685	ZCF7	JMR049	0.674	0.162777	0.155939
19.1693	CAS4	CJN958, CJN959	0.411379	0.33701	0.00427002
19.1718	ZCF8	DSY3447 -11-13	0.530612	0.0605327	0.0237044
19.1729	-	CJN966	1.32484	0.405819	0.628232
19.173	-	CJN395	0.754554	0.184683	0.2477
19.1759	PHO23	SFY46	0.651423	0.221817	0.1847
19.1826	MDM34	CJN975,	2.39655	0.677704	0.0519018
19.1971	TRY3	SFY42	0.480392	0.0452424	0.0223665
19.1973	HAP5	JMR053	0.833	0.507824	0.740413
19.2012	NOT3	HL11-1,-3	0.294118	0.162189	0.0466711
19.2054	FGR15	CJN831	1.3884	0.324007	0.225478
19.217		DSY3430 -3	1.08163	0.141179	0.563564
19.2280	ZCF10	CJN799	0.732484	0.154967	0.110999
19.2315	-	CJN864	0.974026	0.382462	0.942834
19.2331	ADA2	CJN863	0.342471	0.126614	0.0258949
19.2356	CRZ2	CJN811, CJN812	0.310471	0.0813589	0.0139626
19.2393	-	CJN872	0.964935	0.284709	0.8858
19.2399	-	CJN874	1.66102	0.520899	0.15605
19.2423	ZCF11	DSY3411 -2	0.877551	0.0945112	0.292893
19.2458	-	CJN878	1.27586	0.637461	0.632548
19.255	ZCF1	DSY3412 -2	0.781818	0.231637	0.390792
19.259		SFY27	Filamentous
19.2612	-	CJN908	0.736686	0.0329352	0.0834
19.2623	ZCF12	FB35	0.6543	0.205273	0.1706
19.2646	ZCF13	CJN593, CJN594	1.06531	0.783275	0.752024
19.2647	ZCF14	CJN544	0.928571	0.16392	0.492907
19.2674	-	CJN911	0.869919	0.136485	0.284458
19.2730	-	JMR074	0.758	0.0617311	0.0421737
19.2745	UME7	CJN494	2.84746	0.520899	0.252948
19.2747	RGT1	HK21-1	0.717	0.107969	0.1218
19.2748	ARG83	JMR085	1.297	0.404833	0.39766
19.2752	ADR1	RLS16	0.98	0.33842	0.903326
19.2753	ZCF15	DSY3413 -2	0.346939	0.121022	0.0316359
19.2808	ZCF16	J869-9	1.83	0.742712	0.24154
19.2823	RFG1	SFY30	0.807843	0.169278	0.3105
19.2842	GZF3	SFY43	0.754902	0.16369	0.243119
19.3012	ARO80	JA54-3	0.7594	0.640378	0.6527
19.3035	-	RLS5	2	0.127488	0.007504
19.3088		CJN885, CJN1438, CJN1439	0.303922	0.191087	0.00384446
19.3127	CZF1	CJN517, CJN1183	0.350087	0.0191611	0.0134405
19.3187	ZNC1	CJN403, CJN404	0.336471	0.25955	0.0382442
19.3188	TAC1	DSY2906	clumping cells
19.3190		RLS84	2.571	0.134959	0.00583496
19.3193	FCR3	CJN926, CJN927	0.46451	0.117677	0.023093
19.3252	DAL81	DSY3414 -1,-3	0.244898	0.0504821	0.00936283
19.3294	MBF1	HZY62	1.48485	0.436484	0.250731
19.3300	ZPR1	CJN928	1.184	0.258327	0.415233
19.3305	ZCF17	CJN593	1.66667	0.112494	0.00506332
19.3308	STB5	CJN531	0.658537	0.249039	0.183812
19.3405	ZCF18	CJN943	1.15385	0.660703	0.649289
19.3407		CJN945, CJN946, CJN919	0.308943	0.0654382	0.0050821
19.3434	TRY5	RLS50, RLS51	0.679	0.0726202	0.0250415
19.3683	AGE3	CJN979, CJN980	0.386334	0.147434	0.0298575
19.3753	SEF1	CJN983, CJN984, CJN985	1.60213	0.299375	0.141421
19.3794	CSR1	CJN341, CJN343, CJN346	0.841667	0.442312	0.903326
19.3809	FIL1	CJN256	0.761905	0.253916	0.254644
19.3835	-	CJN993	1.368	0.22218	0.18986
19.3865	RFX1	RLS28	1.067	0.625425	0.91263
19.3876	ZCF19	RLS7	1.091	0.405995	0.970777
19.391	UPC2	JMR038	0.844	0.331135	0.64207
19.3928	-	CJN299	0.701299	0.14417	0.222458
19.3969	SFL2	SFY9	0.945946	0.318997	0.862639
19.3986	PPR1	CJN411, CJN412, CJN417	3.06599	1.35503	0.0020333
19.4062	TRY2	SFY7, 7-2	0.284314	0.0627285	0.016294
19.4125	-	CJN396	0.740816	0.307633	0.3785
19.4145	ZCF20	DSY3415 -1	1.22449	0.999113	0.818349
19.4166	ZCF21	DSY3416 -1	0.64	0.95296	0.765491
19.4225	LEU3	RLS18, DSY3417-1	0.554	0.103699	0.034827
19.4288	CTA7	HW25-2	1.822	0.174727	0.017776
19.431	ZCF2	CJN563	0.726027	0.272129	0.427402
19.4318	MIG1	CJN434	0.856	0.0488527	0.0717209
19.4433	CPH1	CJN305	0.940828	0.583047	0.857434
19.4450		DSY3419 -1	0.781818	0.0651189	0.0629574
19.4524	ZCF24	HM72-4	0.967	0.713472	0.962149
19.454	SFL1	SFY8, SFY8-2	4.18919	0.484579	0.0121977
19.4568	ZCF25	CJN518, CJN519, CJN522	7.49197	1.70042	0.0112722
19.4573	ZCF26	CJN598	0.653061	0.410937	0.479565
19.4649	ZCF27	HZY61	1.18182	0.259223	0.427922
19.4662	RLM1	BRY429	clumping cells
19.4722		JMR089	0.29	0.06125	0.007607
19.4752	MSN4	CJN334	0.707792	0.434472	0.324479
19.4766	ARG81	CJN401, CJN402	0.468979	0.206602	0.0165784
19.4767	ZCF28	CJN803, CJN804	0.293101	0.0534559	0.0494244
19.4775	CTA8	JMR044	0.623	0.272	0.252964
19.4776	LYS143	CJN805, CJN806	0.678378	0.0271415	0.0973256
19.4778	LYS142	CJN807, CJN808	0.63964	0.0585784	0.22209
19.4882	-	JMR087	1.326	0.341218	0.658028
19.4884	WOR1	AI54	0.707	0.114633	0.10974
19.4941	TYE7	SFY32	0.84902	0.12473	0.3278
19.4961	STP2	DSY3422-8	1.18367	0.296525	0.542504
19.4972	-	CJN393	0.864	0.0841739	0.213334
19.4998	ROB1	RLS11	0.72	0.0645463	0.0283344
19.5026	-	CJN427	0.705405	0.231417	0.2455
19.5107	NOT5	JJH11	0.644	0.0921338	0.0636708
19.5133	ZCF29	CJN495	2.778	1.94925	0.398139
19.5312	MET4	SFY39.39-2	0.202703	0.11044	0.0181655
19.5325	KIN3	CJN348	1.67143	0.402465	0.0787855
19.5334	-	G376-1	0.833	0.0785674	0.121541
19.5338	GAL4	CJN801	0.696396	0.109994	0.11
19.5343	ASH1	RLS131	1.12	0.27118	0.405972
19.5380	LYS144	CJN577	0.709845	0.277567	0.411666
19.5389	FKH2	SFY14	Filamentous
19.5498	EFH1	D966-1	1.818	0.340663	0.105009
19.5548	LYS14	CJN528	1.12329	0.701214	0.784674
19.5552	-	JMR088	0.857	0.03862	0.066992
19.5666	-	JMR035	1.467	0.936834	0.619812
19.5729	FGR17	CJN506	1.488	0.340386	0.235286
19.5848		HZY14	2.04286	1.85796	0.405284
19.5849	CWT1	HZY60	1.07576	0.234295	0.718282
19.5855	MBP1	RLS76	2.045	0.126033	0.00931272
19.5871	SNF5	JC25-6, JC25-7	0.0273973	0.0168947	0.0065
19.5908	TEC1	CJN308	1.368	0.0466193	0.452068
19.5910	-	JMR062	0.767	0.127421	0.169496
19.5917	STP3	HZY35	0.69	0.305266	0.3092
19.5924	ZCF31	DSY3420-1	0.4	0.0428416	0.00455999
19.5940	ZCF32	DSY3421-1	3.15517	1.70124	0.224708
19.5953		DSY3452 -15	0.795918	0.0612502	0.0871291
19.5975	TRY4	CJN809, CJN810	0.353059	0.224777	0.0431272
19.6011	SIN3	RLS44	1.286	0.577046	0.287607
19.6038	UGA32	GR52-1	0.6	0.304467	0.2227
19.610	EFG1	CJN450	0.896552	0.280969	0.717784
19.6102		HZY7-1	Filamentous
19.6109	TUP1	JMR069	Filamentous
19.6121	MNL1	DSY3410 -1	1.04082	0.181587	0.817426
19.6124	ACE2	DSY3423-6,-9	0.362238	0.155782	0.0317
19.6182	ZCF34	CJN548, CJN549, CJN562	0.267365	0.00998642	0.0134405
19.6203	PUT3	RLS48	0.97	0.206721	0.725175
19.6407		HZY15	1.14286	1.15941	0.380884
19.6414	-	HQ12-3	2.044	1.38866	0.535166
19.6626		DSY3331	0.963636	0.399607	0.925875
19.6712		RLS42	0.928	0.130498	0.160746
19.6713	-	RLS82	0.821	0.337465	0.408157
19.6754	-	ID27-1	1.391	0.26458	0.875965
19.6781	ZFU2	CJN997, CJN998, CJN999	0.197268	0.132428	0.0119769
19.6801	RPD31	RLS105	4.67	1.37124	0.159254
19.681	HAP43	DSY2989	1.81818	0.739461	0.272921
19.6817	FCR1	CJN242, CJN243, CJN248	1.03636	0.00665289	0.248191
19.6824	TRY6	SFY10,-2	0.215686	0.0713157	0.0152681
19.6845	-	CJN1001	4.30357	1.56833	0.144279
19.6850	-	CJN1003	0.753886	0.294666	0.3838
19.6923	-	RLS36	0.933	0.170969	0.698489
19.6985	TEA1	HZY23	1.83333	0.506153	0.118277
19.7017	YOX1	JMR092	1.639	0.309944	0.119753
19.7025	MCM1	CJN1007	0.893782	0.292136	0.6779
19.7098		RLS135	2.667	0.632889	0.214645
19.7150	NRG1	CJN322	Filamentous
19.723	BCR1	CJN459, CJN813, CJN814	0.268561	0.0876002	0.00589628
19.7247	RIM101	CJN267	0.830508	0.282902	1
19.7317	UGA33	CJN571, CJN572, CJN576	0.613724	0.291537	0.0194452
19.7319	SUC1	RLS3,3-2	0.622	0.0481125	0.0297588
19.7359	CRZ1	CJN442	1.03226	0.272367	0.133256
19.7371	ZCF35	RLS26	1.667	0.408346	0.188893
19.7372	MRR1	IU75-1	0.816	0.229267	0.49872
19.7374	CTA4	RLS1	2.24	0.537321	0.248695
19.7381	ZCF37	J793-2	1.31164	0.0165877	0.0427785
19.7385	-	IN73-1	0.667	0.123477	0.136132
19.7518	ZCF38	CJN491	0.739726	0.133386	0.304826
19.7570	UGA3	CJN511	1.28767	0.253916	0.459043
19.7583	ZCF39	CJN495, CJN496, CJN505	0.381182	0.119602	0.0401772
19.7622	SPT3	RLS133	Filamentous
19.798	TAF14	CJN856	0.0662833	0.0577841	0.00790526
19.8586	SKN7	G555-2,-4	0.95	0.160244	0.7509
19.861		HZY5-1	1.27143	1.12061	0.728544
19.889	THI20	CJN857	0.717857	0.125104	0.1389
19.909	STP4	CJN817	1.144	0.512032	0.580183
19.9326	-	CJN815	0.63964	0.152849	0.345229
19.971	SKN7	SFY29	3.25676	2.03202	0.324959

## Sheet: Supplemenatal Table 1B
							Insertion mutant his-
ORF	Gene name	Strain name	mt/wt	stdev	p-value		Strain name	mt/wt	stdev	p-value		Strain name	mt/wt	stdev	p-value
	WT	WT	1	0.101459	1		DAY286	1	0.11	1		DAY185	1	0.0527458	1
19.3434	try5	TF014	0.176321	0.0382135	0.0086		RLS50, RLS51	0.679	0.0726202	0.0250415		EHY91	0.417959	0.020836	0.0047
19.7319	suc1	TF067	0.382353	0.0661547	0.0187		RLS3,RLS3-2	0.622	0.0481125	0.0297588		EHY85	0.477576	0.0411472	0.0081
19.7317	uga33	TF066	0.656863	0.0466	0.0491		CJN571, CJN572, CJN576	0.613724	0.191537	0.0194452		EHY8	0.247049	0.00996905	0.0025
19.4225	leu3	TF025	0.270588	0.092301	0.0172		RLS18, DSY3417-1	0.554	0.103699	0.034827		EHY88	0.18254	0.066912	0.0054
19.1035	war1	TF085	0.183746	0.0605997	0.0103		DSY3429-1,DSY3429-2	0.530612	0.0605327	0.0237044		EHY73	0.244444	0.0320085	0.00853987
19.1718	zcf8	TF141	0.227762	0.141035	0.0244		DSY3447-11 ,DSY3447-13	0.530612	0.0605327	0.0237044		EHY76	0.288889	0.0341506	0.00962486
19.1971	try3						SFY42	0.480392	0.0452424	0.0223665		EHY30	0.508475	0.0620985	0.0151084
19.4766	arg81	TF130	0.341466	0.11957	0.0272		CJN401, CJN402	0.468979	0.206602	0.0165784		JFY176*	0.231481	0.0756482	0.00930386
19.3193	fcr3	TF129	0.265018	0.0793901	0.015		CJN926, CJN927	0.46451	0.117677	0.023093		EHY61	0.185185	0.0788071	0.0131254
19.5924	zcf31	TF053	0.129412	0.0430092	0.0079		DSY3420-1	0.4	0.0428416	0.00455999		EHY70	0.24533	0.0588686	0.0054
19.7583	zcf39	TF073	0.220848	0.0530373	0.0106		CJN495, CJN496, CJN505	0.381182	0.119602	0.0401772		EHY43	0.336735	0.0266719	0.00864401
19.5975	try4	TF055	0.772184	0.08	0.0427		CJN809, CJN810	0.353059	0.224777	0.0431272		EHY27	0.40625	0.0483879	0.0072
19.3127	czf1	TF104	0.404908	0.115425	0.0318		CJN517, CJN1183	0.350087	0.0191611	0.0134405		EHY46	0.213115	0.0225415	0.00431222
19.2331	ada2						CJN863	0.342471	0.126614	0.0258949		VIC1145, VIC1151	0.33	0.02	0.04
19.3187	znc1	TF133	0.300613	0.0787617	0.0164		CJN403, CJN404	0.336471	0.15955	0.0382442		EHY34	0.293651	0.0286182	0.0036
19.2356	crz2	TF096	0.132622	0.0299004	0.0074		CJN811, CJN812	0.310471	0.0813589	0.0139626		DAY951*	0.143939	0.063049	0.0114685
19.467	cas5	TF033	0.2	0.0834489	0.0132		CJN432, CJN433	0.302526	0.167622	0.0137444		EHY24	0.241758	0.00306805	0.00358068
19.668	fgr27	TF119	0.54908	0.0635925	0.0335		CJN419, CJN422	0.296968	0.0122545	0.0313422		EHY40	0.49	0.0414684	0.00947529
19.2012	not3						HL11-1, HL11-3	0.294118	0.162189	0.0466711		EHY79	0.318182	0.0450481	0.0140205
19.4767	zcf28	TF146	0.114841	0.0438446	0.0077		CJN803, CJN804	0.293101	0.0534559	0.0494244		JFY144	0.225116	0.00900252	0.0024
19.4062	try2						SFY7, SFY7-2	0.284314	0.0627285	0.016294		EHY97	0.279265	0.00530943	0.0027
19.723	bcr1	TF137	0.26	0.06	0.0124		CJN459, CJN813, CJN814	0.268561	0.0876002	0.00589628		CJN702	0.167084	0.078533	0.0064
19.6182	zcf34	TF060	0.194346	0.0444051	0.0107		CJN548, CJN549, CJN562	0.267365	0.00998642	0.0134405		EHY108	0.294029	0.152618	0.0252
19.3252	dal81	TF155	0.607774	0.0707715	0.0463		DSY3414-1,DSY3414-3	0.244898	0.0504821	0.00936283		EHY67	0.373016	0.0356232	0.0051
19.6824	try6	TF062	0.121951	0.0342256	0.0074		SFY10, SFY10-2	0.215686	0.0713157	0.0152681		EHY103	0.268657	0.0773604	0.0081
19.5312	met4						SFY39,SFY39-2	0.202703	0.11044	0.0181655		EHY106	0.261905	0.0367927	0.0038
19.6781	zfu2	TF0120	0.22549	0.118345	0.0197		CJN997, CJN998, CJN999	0.197268	0.132428	0.0119769		JFY151	0.237705	0.031547	0.00516266
19.798	taf14						CJN856	0.0662833	0.0577841	0.00790526		EHY55	0.151515	0.106717	0.0189018
19.5871	snf5						JC25-6, JC25-7	0.0273973	0.0168947	0.0065		DHY2	0.03	0.0308607	0.0045961
19.6124	ace2	TF059	0.322034	0.0374015	0.0158643		DSY3423-6, DSY3423-9	0.362238	0.155782	0.0317		CTN85	0.392857	0.151523	0.0152681

## Sheet: Supplemental Table 1C
ORF	Gene name	Type of Mutation	Strain name	mt/wt	stdev	p-value
			DAY185	1	0.0527458	1
19.4766	arg81	Deletion	JFY176	0.231481	0.0756482	0.00930386
Complement	arg81+pARG81	Complement	JFY178	0.820019	0.298371	0.4893
19.2331	ada2	Deletion	VIC1145, VIC1151	0.329545	0.0160706	0.0443455
Complement	ada2+pADA2	Complement	VIC1197	1.20455	0.218245	0.925256
19.2356	crz2	Deletion	DAY951	0.143939	0.063049	0.0114685
Complement	crz2+pCRZ2	Complement	DAY953	0.94	0.04	0.102416
19.4767	zcf28	Deletion	JFY144	0.225116	0.00900252	0.0024
Complement	zcf28+pZCF28	Complement	JFY178	0.8991	0.1245	0.4019
19.6781	zfu2	Deletion	JFY151	0.237705	0.031547	0.00516266
Complement	zfu2+pZFU2	Complement	JFY150	0.9981	0.0441	0.9724
19.5871	snf5	Deletion	DHY2	0.03	0.0308607	0.0045961
Complement	snf5+pSNF5	Complement	DHY08	0.87	0.113	0.2783
19.6124	ace2	Deletion	CTN85	0.392857	0.151523	0.0152681
Complement	ace2+pACE2	Complement	CTN90	0.992389	0.233901	0.9683
19.7319	suc1	Insertion	EHY85	0.302326	0.0447954	0.0212765
Complement	suc1+pSUC1	Complement	CW431, CW432	0.767442	0.0548145	0.133928
19.7317	uga33	Insertion	EHY8	0.25	0.0342538	0.0213936
Complement	uga33+pUGA33	Complement	CW465, CW466	1.22685	0.202966	0.254747
19.1718	zcf8	Insertion	EHY76	0.166667	0.089785	0.0247304
Complement	zcf8+pZCF8	Complement	CW459,CW460	1.1383	0.117024	0.236607
19.3193	fcr3	Insertion	EHY61	0.185185	0.0696386	0.0224636
Complement	fcr3+pFCR3	Complement	CW462, CW463	0.643519	0.0196419	0.151451
19.6182	zcf34	Insertion	EHY108	0.388889	0.0667101	0.0348236
Complement	zcf34+pZCF34	Complement	CW456, CW457	0.851852	0.0261891	0.152681
19.3252	dal81	Insertion	EHY67	0.136842	0.0131578	0.0014839
Complement	dal81+pDAL81	Complement	CW454	1.6	0.157317	0.0440062
19.4062	try2	Insertion	EHY97	0.342105	0.0313821	0.0140962
Complement	try2+pTRY2	Complement	CW434	1.44737	0.22693	0.126769
19.1971	try3	Insertion	EHY30	0.341085	0.116203	0.0406956
Complement	try3+pTRY3	Complement	CW437, CW438	0.709302	0.11511	0.07024
19.5975	try4	Insertion	EHY27	0.486486	0.0691705	0.0440062
Complement	try4+pTRY4	Complement	CW440, CW441	0.891892	0.196295	0.201631
19.3434	try5	Insertion	DHY91	0.328947	0.141287	0.0421585
Complement	try5+pTRY5	Complement	CW443	0.828947	0.131557	0.293937
19.6824	try6	Insertion	EHY103	0.368421	0.0700386	0.021833
Complement	try6+pTRY6	Complement	CW445, CW446	1.10526	0.148865	0.42265
