# Supplementary material for: Portrait of Candida albicans Adherence Regulators
Source: PLoS Pathog. 2012 Feb 16;8(2):e1002525. doi: 10.1371/journal.ppat.1002525 (PMC3280983; doi:10.1371/journal.ppat.1002525)
Supplement: Table S3 — NanoString expression data for ACE2-OE and ZAP1-OE strains. NanoString measurements of reporter gene expression are provided as raw numbers for individual assays, as well as means and standard deviations. (XLS) [file ppat.1002525.s005.xls]

## Sheet: Legend
Expression data were generated by nanoString and analyzed as described in the methods. The data for reference wildtype strain DAY185 is the average of 6 independent determinations, for all mutants are averages of 3 independent determinations, and for the ACE2-OE and ZAP1-OE strains are a single determination. Relative expression ratios (fold changes compared to DAY185) are shown in the sheets “AC…

## Sheet: ACE2-OE
Gene	DAY185	snf5 average	snf5 ACE2OE	ace2 average
IFE2	1	0.0278246	1.43742	0.582053
HWP1	1	1.1309	1.82302	0.891035
ECE1	1	0.449664	1.52745	0.284117
ALS3	1	0.7205	1.54364	0.431435
SOD5	1	0.0623003	1.84402	0.499445
HYR1	1	0.189622	1.56051	0.796331
SAP5	1	0.0971065	2.44748	1.01094
SAP6	1	0.532588	4.6262	1.21397
SAP4	1	1.11736	6.02244	2.11087
GAL1	1	0.219885	1.43917	0.504214
PCK1	1	0.925537	1.89803	0.617702
TEC1	1	4.25299	3.28669	0.674166
ALS1	1	1.4682	2.11266	0.65472
RBT1	1	6.67813	1.87886	0.789952
UME6	1	1.47249	1.80651	0.623582
PGA34	1	0.172898	1.93665	1.26387
HGT6	1	0.131241	1.47341	0.700315
ADH5	1	0.085235	1.40316	0.898802
orf19.670.2	1	2.12701	1.6864	0.927378
orf19.5114.1	1	0.661885	1.30949	0.958796
UCF1	1	0.461222	0.580269	0.878294
SOD6	1	0.995699	1.94711	0.439866
CRZ2	1	0.190748	1.51429	0.657092
CSA2	1	0.444154	0.459458	0.442003
PGA13	1	4.67111	1.1522	3.38424
EXG2	1	2.90041	1.48238	0.837797
CRH11	1	0.208013	1.36016	0.211397
PGA58	1	0.651219	0.894556	2.44771
PHR2	1	0.984535	1.32529	1.40441
FAV2	1	2.69551	1.82374	2.06419
ECM331	1	0.437393	1.20674	1.69164
PGA23	1	0.605795	2.04278	1.30291
RBR1	1	0.553217	1.23722	2.66399
orf19.4921.1	1	0.34449	6.25006	0.653593
AGP2	1	0.335056	2.89749	1.54191
MDR1	1	0.550949	0.34095	0.920807
RHR2	1	0.629093	5.59677	0.926526
CSA1	1	0.295302	0.305739	0.440329
RBT5	1	0.450482	0.502948	0.674999
PGA7	1	0.475369	0.485265	0.529478
PHO89	1	0.0561081	2.32009	0.768994
CHT2	1	0.0825489	0.872109	0.412316
orf19.5267	1	0.0327477	0.573721	0.0511911
CHT3	1	0.0478571	0.717237	0.0459482
ACE2	1	0.442976	1.45288	0.0109413
SCW11	1	0.105729	0.551317	0.0212303
FGR41	1	0.132552	0.732078	0.0351087
PGA38	1	0.269484	0.86131	0.0172076
ASH1	1	0.362811	0.948565	0.143571
ENG1	1	0.316664	0.771217	0.313773
PIR1	1	0.242946	0.725383	0.0764524
RHD3	1	0.277345	0.912946	0.460668
PRA1	1	0.00973594	0.309034	6.82686
ZRT1	1	0.031738	0.279005	7.01036
ZRT2	1	0.274456	0.378937	3.31712
ZAP1	1	1.50689	0.755247	2.82906
AOX2	1	0.380003	1.97791	1.02116
IFD6	1	0.14053	0.55112	5.29777
DDR48	1	0.153024	1.00696	2.09005
orf19.1534	1	0.32712	0.495483	3.70519
CSH1	1	0.168795	0.562519	2.84905
FDH1	1	0.123509	0.737352	0.932807
HWP2	1	1.28979	1.26552	1.62277
PGA31	1	2.11437	1.25589	1.36956
PGA30	1	0.893198	1.13368	1.00255
PBR1	1	0.934559	2.33707	2.60095
orf19.4654	1	0.677503	1.05991	1.23154
orf19.7606	1	1.37341	1.04135	1.21926
PGA15	1	1.7045	0.971048	1.07708
PGA57	1	1.76482	1.50563	1.18297
PGA26	1	0.983327	0.748764	1.06494
PGA44	1	1.94535	1.34446	1.27188
PGA37	1	0.795243	1.5372	0.928921
CRH12	1	0.98844	1.07241	1.06322
SAP8	1	1.20359	1.19451	1.12998
GCA1	1	0.689537	1.11232	1.44218
FGR23	1	0.820251	1.28211	1.10772
PGA18	1	2.31201	1.44899	1.10937
PGA61	1	1.19426	1.02277	1.00012
PGA41	1	3.0835	1.11906	0.836213
SAP1	1	1.30531	0.893275	0.991849
IFF8	1	2.33015	0.924503	1.18479
orf19.7130	1	0.646806	0.975098	0.831787
PGA5	1	1.14943	0.515459	1.06148
orf19.4653	1	0.703876	0.700698	0.848671
HGT12	1	2.5864	1.12272	1.07005
PGA39	1	1.09353	0.959226	1.44543
SAP2	1	0.79342	0.635532	1.60229
HYR3	1	0.950829	1.19046	1.27439
QDR1	1	0.623999	1.43964	1.21481
IFF5	1	1.2159	0.899357	1.39881
UEC1	1	0.928533	1.19895	1.24024
PGA12	1	0.905976	1.05544	1.49168
PGA16	1	0.91192	0.839145	1.19853
PGA42	1	1.00998	1.18768	0.905507
PGA50	1	0.928046	1.02453	1.02101
SPR1	1	0.666228	0.857909	0.748031
PGA10	1	0.680585	1.00851	1.25241
RME1	1	1.92719	1.21434	0.99278
PGA28	1	1.22558	1.19567	0.9405
PGA60	1	1.78579	1.03555	1.14533
SAP3	1	1.06151	0.813691	1.07342
PGA11	1	0.868744	0.926472	1.17402
PGA22	1	0.913484	0.565307	1.28079
PGA46	1	0.607015	0.968503	1.00429
orf19.4652	1	0.651901	0.809958	1.129
PGA49	1	0.520181	0.420473	1.19721
IFF3	1	1.12105	0.50996	1.28198
IFF4	1	1.57582	1.03671	1.19909
orf19.6390	1	0.727469	0.703439	1.15711
orf19.1691	1	0.094117	0.428885	0.896804
RNR22	1	0.0482911	1.2657	1.36086
PGA48	1	1.19886	1.48208	0.341507
orf19.5282	1	0.529991	1.32894	0.549226
STF2	1	0.707869	0.914128	0.563435
HSP104	1	0.549945	1.29786	0.488039
orf19.449	1	0.516857	1.79804	0.735917
orf19.5626	1	0.782838	1.48438	0.669043
XYL2	1	0.403803	1.06168	0.932625
PFK2	1	0.334536	1.0039	0.829991
PFK1	1	0.569528	1.06816	0.939401
GLK1	1	0.619314	0.955762	1.09854
CPH2	1	1.14843	1.17686	1.05804
orf19.6578	1	0.472275	1.4695	0.996663
GNP1	1	0.178344	1.57224	0.922716
ADH1	1	0.037874	1.22032	0.902285
TYE7	1	0.0609223	1.30465	1.14482
orf19.5334	1	0.28158	0.57601	0.989735
KIP4	1	0.292259	1.81236	0.98448
IHD1	1	0.468166	1.48032	1.01267
YHB1	1	0.186529	2.39045	1.43398
orf19.1862	1	0.102666	0.821169	0.977628
PGA25	1	14.8446	3.44772	1.26139
PGA17	1	5.69486	2.04526	1.27964
SCW4	1	3.01152	2.0566	1.45901
PGA45	1	2.68955	2.09178	1.19373
zfu2	1	3.49995	2.09164	0.886361
GPD2	1	2.43684	4.51321	0.90407
NRG1	1	0.339402	1.28855	1.08651
YWP1	1	0.0708079	0.501779	0.901138
ENA2	1	1.02979	2.27224	1.01904
orf19.3088	1	0.849774	2.47439	0.790465
NOP7	1	0.665232	1.63803	0.746567
ENA21	1	0.256072	1.40365	0.728307
ZCF28	1	1.2986	1.03309	0.881499
CAS5	1	1.28513	1.97512	1.07492
GPD1	1	0.81411	1.74742	0.914568
orf19.7091	1	0.984245	0.938672	0.916588
orf19.409	1	1.31069	1.72784	0.832129
orf19.2529	1	1.76723	1.36023	0.815008
TPK1	1	1.29411	2.16786	0.832988
ALS5	1	1.19047	1.61109	0.826415
SMF3	1	1.05224	0.988882	0.873175
ALS2	1	1.08504	1.46529	1.02603
SKO1	1	0.738661	1.15254	1.04352
VPS28	1	0.886135	1.06678	0.938189
ALS9	1	0.834932	0.468073	0.955028
TRR1	1	1.4436	1.16975	0.838469
KGD1	1	1.66557	1.18103	0.822284
orf19.4623	1	0.731093	1.13979	0.784156
ERG6	1	1.13693	1.08653	0.896629
PMT1	1	0.985836	1.0045	0.902116
PMT4	1	0.867055	0.995403	0.785613
TRX1	1	0.957153	0.957632	0.649067
HSP90	1	0.883802	1.05125	0.709605
FBP1	1	1.36853	1.19704	0.686197
orf19.3460	1	1.44563	0.658384	0.838856
MET10	1	1.62549	1.38242	0.853277
ARO9	1	1.07831	1.04259	0.835999
RBD1	1	1.25921	1.20479	1.04715
CRZ1	1	1.62707	1.11891	1.02238
DFG5	1	1.35756	1.04837	0.995407
UTR2	1	1.51453	1.3623	0.997976
EAP1	1	1.4047	1.22385	1.08033
GCN4	1	3.30401	1.0145	1.09642
FGR6-4	1	1.07098	0.802109	1.09459
orf19.1424	1	1.4181	0.92616	1.20324
PGA33	1	0.756572	1.11063	1.25043
PGA1	1	2.25451	1.26589	1.05797
PGA62	1	1.1456	1.25746	1.26235
GIN4	1	1.07818	1.37527	1.20598
RLM1	1	0.986708	1.50039	1.05563
GSC1	1	1.27816	1.62527	1.2207
orf19.6756	1	2.50663	1.16209	0.905877
ZCF8	1	1.58251	0.931785	0.901261
SSR1	1	1.59177	1.35065	0.898018
orf19.206	1	1.28624	1.1086	1.03878
TOR1	1	1.38416	1.24038	0.940212
IRE1	1	1.30933	0.999253	0.948119
VPS17	1	1.29787	1.03982	0.917889
GPI8	1	1.02471	0.926593	0.92021
GPI19	1	1.05826	0.756199	0.923447
orf19.5401	1	1.41961	1.31888	1.01833
RBR3	1	1.30926	1.20818	0.992844
orf19.4014	1	1.44091	1.33468	1.14444
MID1	1	1.205	1.32973	0.929974
orf19.4292	1	1.17237	1.27631	0.966013
DCW1	1	1.21441	1.0515	1.0327
PGA63	1	1.18829	1.0789	1.03648
HOG1	1	1.18853	1.18117	0.891232
TUP1	1	1.12917	1.07522	0.98088
CBK1	1	1.21737	1.15037	0.888714
SSK2	1	0.956653	1.17218	0.948157
orf19.2677	1	1.28941	1.13638	0.976663
ERG25	1	1.54619	2.03938	0.957668
CNB1	1	1.04978	1.05836	0.914843
orf19.5693	1	1.27178	1.16814	0.879709
orf19.2411	1	1.30174	1.24733	1.02744
HYR4	1	1.38681	1.04854	1.19379
PGA27	1	1.59391	1.59947	1.05825
GSL1	1	1.95269	1.04766	1.26417
orf19.4174	1	1.38317	1.04728	1.00062
PGA55	1	1.29178	1.83561	1.11871
SPT14	1	1.41364	1.07723	0.96964
MKC1	1	1.59002	1.00226	0.9884
GPI2	1	1.27813	0.929912	0.9692
orf19.2529.1	1	1.87106	3.44453	1.04025
PGA43	1	1.67063	0.758408	1.05541
CDR2	1	2.41015	1.04874	1.54849
orf19.2030	1	1.19194	1.40821	0.894229
PGA52	1	1.0347	1.45845	1.0506
SAP9	1	0.555658	1.59829	0.896064
PIN3	1	2.1283	1.6906	0.94117
UGP1	1	0.767639	0.987306	1.05216
CHS1	1	0.551116	0.821808	1.09158
ERG11	1	0.815898	1.23136	1.19101
DAK2	1	0.841781	1.14633	1.20628
PGA4	1	0.776352	1.31511	1.04139
CHK1	1	0.738113	1.73754	0.888306
MAE1	1	0.723223	1.06996	0.873461
orf19.1212	1	0.751371	0.974206	0.954668
PGA59	1	0.771433	1.23342	1.05275
GPI1	1	1.91121	1.07602	0.969719
PGA56	1	1.724	1.53035	0.78914
orf19.5455	1	1.73207	1.39117	0.783056
orf19.6329	1	2.47097	1.09329	0.962871
PGA32	1	0.841123	1.33907	1.07429
PLB3	1	1.12062	1.65608	0.891571
RFG1	1	2.95088	1.66956	1.04013
CAP1	1	1.70455	1.04	0.866633
FLO8	1	1.5088	1.44153	0.887822
SSK1	1	1.12403	1.7963	0.953899
YAK1	1	1.26306	1.13632	0.986257
UPC2	1	0.853843	0.963561	1.06924
ALS6	1	1.90603	1.08441	1.10295
ALS7	1	1.75091	1.24978	0.998418
IFF6	1	1.44678	1.12671	0.998843
CPH1	1	1.18428	1.09901	1.42503
CDR1	1	0.5724	1.39103	1.64823
ECM33	1	0.501829	0.900305	0.820539
SGA1	1	0.479929	0.559824	1.01102
ERG1	1	0.682438	1.10132	1.03024
EFG1	1	1.0154	1.44837	1.07512
ERG3	1	1.52442	1.5534	1.21169
SUN41	1	0.791928	1.25392	1.00537
PHR1	1	0.829025	1.51389	0.987389
BCR1	1	1.59718	1.54054	1.14614
ARO8	1	1.21472	1.04489	0.833019
CIT1	1	0.89214	0.705953	0.777161
KRE1	1	1.38949	2.08978	0.998897
ARG81	1	0.942752	1.20823	0.851591
orf19.4706	1	2.87771	1.95495	1.19489
RBR2	1	1.62326	1.25655	1.06484
TPO3	1	1.75509	1.38197	0.926032
orf19.6660	1	1.14045	2.29567	1.31563
STP4	1	1.23917	2.21189	1.35764
orf19.675	1	0.66418	1.04054	0.950233
orf19.2049	1	0.85646	0.759162	0.94119
CZF1	1	0.956742	1.47969	1.08315
SAP10	1	0.537271	1.49304	1.1552
PGA6	1	0.532032	0.916619	1.01217
CHT1	1	0.862858	0.854431	1.2136
PGA54	1	0.574535	1.18239	1.17956
orf19.6816	1	1.22397	0.670807	1.05572
RCT1	1	3.33537	1.11979	0.976624
PLB5	1	0.368887	1.00315	1.37681
HTA2	1	0.589186	0.775659	0.991104
PGA14	1	0.686479	1.01377	0.796069
PGA53	1	0.299436	0.779902	0.834571
PIL1	1	0.429139	0.864066	1.02484
HSP70	1	0.440214	0.92655	0.900005
YCK3	1	1.01048	1.30096	1.07344
PDR16	1	0.596098	0.812931	1.80652
TPK2	1	0.738778	0.822115	1.01916
SNF5	1	0.105016	0.0668822	1.034
CAT1	1	0.651772	1.12401	1.09174
AOX1	1	0.95927	0.867615	1.14061
GCA2	1	0.954032	0.925647	1.03229
PLB4.5	1	0.255019	0.636112	0.882419
orf19.2125	1	4.45337	1.29794	0.892532
SOD4	1	2.28881	0.930729	1.02494
ALS4	1	0.171606	0.759805	0.660201

## Sheet: ZAP1-OE
Gene	DAY185	DAYT185 ZAP1OE	zap1 average	arg81 average	arg81 ZAP1OE	zcf28 average	zcf28 ZAP1OE	zcf34 average	zcf34 ZAP1 OE	uga33 average	uga33 ZAP1OE	try2 average	try2 ZAP1OE
IFE2	1	0.908611	0.441824	1.09995	0.482097	0.675373	0.758296	1.37953	0.495205	0.661086	1.7194	0.691111	2.76721
HWP1	1	1.10083	1.12332	2.05173	0.630423	0.382463	0.511274	4.00292	1.42786	0.338679	1.18151	0.355026	0.973843
ECE1	1	1.1473	1.01379	1.99387	0.639132	0.420122	0.584738	2.39364	0.678352	0.397317	1.21025	0.384375	0.811228
ALS3	1	1.06412	0.841605	1.92849	0.587649	0.538266	0.572662	3.6823	1.08107	0.495881	1.19161	0.483424	2.11543
SOD5	1	1.25296	0.84075	1.95536	0.800083	0.586426	0.781018	2.90386	1.01422	0.403015	1.591	0.362157	1.02302
HYR1	1	1.23066	1.523	3.22161	1.12613	0.257976	0.643221	2.52928	0.38111	0.285926	2.03968	0.285712	0.36614
SAP5	1	1.94129	1.77537	2.59504	1.86293	0.315733	1.06545	1.77131	1.69501	0.270486	1.76537	0.234207	0.949901
SAP6	1	1.41428	3.48691	4.19027	1.43043	0.304941	1.19769	4.89007	2.96245	0.238031	2.82602	0.200341	1.14862
SAP4	1	1.79469	5.20402	4.73159	2.45424	0.354588	2.62466	3.05562	2.28894	0.245075	4.11155	0.344133	0.794739
GAL1	1	0.896176	0.723707	1.09719	0.80895	0.734364	0.950492	2.30193	0.608512	0.960326	1.65449	0.99991	2.30299
PCK1	1	1.63554	1.672	1.40589	0.964246	0.728648	1.06387	3.41361	5.12921	1.11577	1.48839	0.979687	5.52651
TEC1	1	1.34148	0.702083	1.05246	1.17924	0.825882	1.06127	1.9378	1.107	1.14662	2.20314	1.11115	1.40508
ALS1	1	1.43106	0.615457	2.06907	1.79982	1.09245	1.42916	5.80978	6.97743	1.15906	2.18137	1.02658	2.41933
RBT1	1	0.751956	0.96501	1.4982	0.693977	0.725853	0.646762	4.35821	3.16539	0.667503	1.03862	0.635314	6.00105
UME6	1	1.30196	0.829182	2.58477	1.09554	0.539219	1.16832	3.00547	0.781779	0.401774	0.998363	0.550786	1.85722
PGA34	1	1.63409	0.552987	2.54866	1.42998	0.556582	1.40126	3.16287	1.05593	0.505728	1.36801	0.571032	1.11772
HGT6	1	1.49238	1.11338	1.38149	0.906562	0.543488	1.06038	3.44681	2.31361	0.518172	1.31007	0.525994	1.80079
ADH5	1	0.881884	0.764967	1.31562	0.613157	0.693983	0.652033	2.3087	1.10376	0.725847	1.56353	0.667566	2.18974
orf19.670.2	1	1.41334	1.54013	1.35619	0.795857	0.657727	0.944943	1.86959	0.898731	0.709021	1.21816	0.715041	4.55438
orf19.5114.1	1	0.920454	0.927374	1.35708	0.872788	0.78975	0.80037	1.7033	0.931899	0.884479	1.20218	0.687485	2.24496
UCF1	1	0.667092	0.641591	1.1511	0.636734	0.72433	0.616922	1.35538	0.737244	0.636966	0.814525	0.747534	1.32522
SOD6	1	0.868797	0.562323	1.15541	0.551109	0.582402	0.777589	1.55326	0.451326	0.630756	1.89571	0.731096	2.9517
CRZ2	1	0.870678	0.43219	0.83947	1.0654	0.73047	1.72688	0.666912	0.39693	0.909016	2.90345	0.972325	2.64143
CSA2	1	0.539387	0.386796	1.15112	1.18725	0.659541	1.43624	0.337707	0.18394	1.35315	0.480846	0.71925	0.432673
PGA13	1	0.997616	0.595307	0.728262	0.647518	0.641081	0.843071	1.81643	1.88981	0.495521	0.988251	0.931806	2.45623
EXG2	1	1.40216	0.954571	1.64326	1.13105	0.813922	1.46509	1.35754	0.744133	0.687303	0.943807	0.789506	1.45399
CRH11	1	1.3347	0.93499	1.67626	0.981054	0.638444	1.01525	1.54967	1.05668	0.473963	1.13026	0.607081	1.22749
PGA58	1	1.24131	0.747172	1.24114	1.28167	0.940508	2.21649	0.733641	0.579701	0.703262	1.14326	0.745167	0.991804
PHR2	1	0.800904	1.07106	1.23515	1.05686	0.784948	1.04263	0.55967	0.556336	0.899081	1.1953	1.08156	0.576102
FAV2	1	0.996384	0.786583	1.31423	1.1566	0.786557	1.23327	1.8711	1.27158	0.726636	0.894234	0.878174	0.536705
ECM331	1	1.03101	1.02131	1.5568	0.902622	0.674762	1.01371	2.14222	0.913436	0.641772	0.913926	0.839566	0.155776
PGA23	1	1.10749	1.15271	1.78732	1.24432	0.525007	1.13393	2.05377	1.47873	0.585606	1.62064	0.579537	0.993343
RBR1	1	1.17183	0.577716	0.666151	0.957693	0.657182	2.04048	0.749332	0.355793	0.617882	1.26782	0.764893	1.43047
orf19.4921.1	1	3.35301	0.575928	1.60492	1.53271	1.24916	2.68367	8.67602	37.1863	1.30791	3.11268	1.29871	7.03928
AGP2	1	2.31355	1.6954	1.62679	2.11071	1.02139	3.20825	2.13955	3.01108	0.949947	3.32755	0.598469	1.03173
MDR1	1	1.74924	0.63306	0.663734	2.13871	1.06933	2.62067	1.42763	3.33186	0.635567	0.823537	0.955159	0.892536
RHR2	1	3.35088	1.44441	1.65614	1.69316	0.768494	3.76855	1.6909	3.27765	0.969984	5.95222	0.429541	0.845094
CSA1	1	0.423523	0.962927	1.66161	0.690517	0.885894	0.382064	0.734313	1.05066	1.06347	0.259037	0.782083	0.348644
RBT5	1	0.612001	0.899134	1.32934	0.915179	1.04631	0.637454	0.945491	1.01673	1.28698	0.657191	0.976904	0.578911
PGA7	1	0.679339	0.862559	1.34769	0.945602	1.10748	0.621522	1.38167	1.77379	1.47907	0.54132	1.12832	0.707781
PHO89	1	1.91295	2.33729	1.42965	1.63414	0.935727	2.16127	0.389407	0.213903	1.14409	2.6161	0.939261	1.6155
CHT2	1	0.910445	1.75906	1.12824	0.689141	0.800117	0.802834	0.180579	0.0575833	0.766356	0.956555	0.782831	1.05025
orf19.5267	1	0.985494	1.06499	0.928538	1.13817	1.07981	1.2428	0.444042	0.523481	1.06864	1.09938	1.00052	1.53569
CHT3	1	1.05786	1.0881	1.1194	1.10861	0.987938	0.968996	0.895441	0.83372	0.831685	1.2426	1.05855	2.02833
ACE2	1	0.789995	0.54539	0.952512	0.765769	0.697097	0.761078	0.641091	0.350893	0.69438	1.22141	1.13965	2.05571
SCW11	1	0.835865	0.995322	0.924156	0.950358	0.924344	0.897303	0.537424	0.489011	0.838556	1.1286	1.07461	1.03512
FGR41	1	1.04525	1.06446	0.991316	1.04959	0.994979	1.04484	0.66482	0.720032	0.939371	1.18362	0.903074	0.95847
PGA38	1	0.89675	1.15783	1.03693	0.844124	0.826469	0.873684	0.679385	0.529489	0.770097	1.17255	0.955841	0.87099
ASH1	1	0.825625	0.943319	1.01301	1.01031	0.870493	0.961065	0.782598	0.500244	0.741696	1.14977	1.0224	1.07598
ENG1	1	1.05852	0.87613	1.03585	0.902058	1.0168	1.31892	0.675818	0.499603	0.727364	1.09639	0.926823	1.00585
PIR1	1	0.838011	0.964193	0.720208	0.709905	0.90049	0.888336	0.761759	0.800938	0.77223	1.10099	0.94901	1.19541
RHD3	1	0.685002	0.654489	0.729726	0.749265	0.900888	1.11836	0.505396	0.144503	0.962661	1.28239	0.910945	1.82358
PRA1	1	0.381713	0.00290963	0.133872	1.51083	1.5919	1.02271	0.059802	0.00457302	1.25014	1.27283	1.5946	1.36451
ZRT1	1	0.565934	0.00983478	0.162061	1.76921	1.61604	1.22054	0.0602468	0.0113498	1.11548	1.37152	1.65901	1.46062
ZRT2	1	1.05557	0.0854163	0.590826	1.77242	1.46412	1.22396	0.163209	0.124838	0.863938	1.33124	1.70963	1.64049
ZAP1	1	1.87163	0.00998062	0.637388	2.20679	1.48641	2.47257	0.324741	1.93266	0.795614	2.18782	1.43652	2.28752
AOX2	1	0.578087	0.125551	0.490982	0.837995	1.48021	1.35274	0.50173	0.204056	1.25192	0.950536	3.85679	1.37429
IFD6	1	1.04539	0.586004	0.740205	1.1104	1.10948	1.49336	1.14867	3.55666	0.99665	1.12745	0.0178211	0.046694
DDR48	1	0.535065	0.753512	1.12803	0.713595	1.11527	0.525065	1.56421	1.64435	1.14755	0.873061	1.6058	0.401776
orf19.1534	1	0.892012	0.383485	0.752281	1.31363	1.10462	1.06563	0.599468	0.518338	0.687734	1.05499	1.36935	1.09819
CSH1	1	0.837477	0.545821	0.625559	1.21131	1.35892	1.23465	0.575306	1.14127	1.09034	1.34059	1.58158	1.09763
FDH1	1	0.330802	0.453354	0.761652	0.39648	0.907812	0.40294	0.500139	0.491585	0.970854	0.766309	1.56587	1.42138
HWP2	1	2.52953	0.104803	1.10429	3.08394	0.905645	5.89353	1.13165	0.0587229	0.125296	1.03098	0.37797	1.46383
PGA31	1	2.00797	0.258309	1.25955	2.5157	0.982599	5.02931	1.12253	0.385086	0.296226	1.34865	0.485024	1.03204
PGA30	1	1.49745	0.456722	0.784514	1.89823	0.909854	2.86805	0.935112	0.254635	0.410105	0.925949	0.856108	0.877959
PBR1	1	2.07853	0.624651	1.05251	2.48356	0.708341	4.01467	2.08175	1.87379	0.407642	1.49312	0.650667	0.881642
orf19.4654	1	1.3955	0.775632	0.80916	1.51859	1.55966	2.11728	1.29392	0.751963	0.701163	1.18614	0.992148	0.917573
orf19.7606	1	1.36847	0.504041	1.06461	1.54227	0.768109	2.92884	1.34489	0.764091	0.635091	1.47006	0.824114	2.19442
PGA15	1	1.40877	0.43226	1.11306	1.89913	1.01317	3.59244	1.1171	0.500717	0.671268	1.07482	0.821285	0.859736
PGA57	1	1.72814	0.503081	1.29469	2.41298	0.932668	3.09951	1.17758	0.265319	0.722103	1.32909	0.881033	1.27288
PGA26	1	2.10762	0.917954	0.976819	2.09473	0.939786	3.45589	1.62431	0.430286	0.69635	1.40684	0.864281	1.36576
PGA44	1	1.54948	0.705097	1.53088	2.50873	0.801972	3.05984	0.935506	0.33297	0.636867	0.985608	0.805677	1.36751
PGA37	1	1.48485	0.350008	1.31614	1.64207	0.865012	2.9306	1.02395	0.398537	0.6007	2.41219	0.793536	2.41181
CRH12	1	1.46175	0.321994	1.78393	2.08396	1.10705	3.88914	1.54288	0.899668	0.567403	0.260565	1.29898	0.977076
SAP8	1	1.36661	0.621745	1.23288	1.58805	1.03601	2.01943	0.500191	0.138753	0.786465	0.885582	1.08332	1.22747
GCA1	1	1.68829	0.831263	1.22413	1.59367	0.836306	2.22195	0.982545	1.28107	0.606799	0.871596	0.66255	1.31046
FGR23	1	1.15518	0.575554	1.15506	0.927897	0.755866	1.53355	0.772467	0.430835	0.765984	1.17602	0.666676	0.970068
PGA18	1	0.944388	0.734096	1.05753	1.02928	0.772276	1.04329	6.31349	3.02371	0.647774	0.977239	0.734396	1.07951
PGA61	1	1.54578	0.677896	0.894485	1.94843	0.861541	2.5308	2.58016	1.30801	0.593569	1.11185	0.662281	1.1492
PGA41	1	1.42912	0.827311	1.01418	1.2641	0.856336	1.93817	0.907152	0.534919	0.683421	0.764218	0.770504	1.10003
SAP1	1	1.33472	0.582684	0.888305	1.44155	1.16336	2.01324	1.15468	0.749315	0.684317	0.961987	0.823855	1.03609
IFF8	1	1.21319	0.569873	1.09016	1.31188	0.658513	2.44321	1.04031	0.45146	0.717989	1.43105	0.987778	1.82297
orf19.7130	1	0.770028	0.729932	1.00236	1.06253	0.774168	2.03644	0.731337	0.934143	0.688098	1.05896	0.892178	1.30398
PGA5	1	0.898636	0.394022	1.214	1.37876	0.790831	1.18415	0.926156	0.666298	0.719634	1.24505	0.868411	1.49999
orf19.4653	1	1.0603	0.144632	0.981149	1.89165	2.41571	2.57374	1.4132	0.70781	0.367886	0.583273	0.396667	0.646642
HGT12	1	2.13486	0.326225	0.969009	1.82868	0.66127	3.25517	1.05385	0.419255	0.560084	0.93706	0.676091	1.22054
PGA39	1	1.25213	0.17689	1.11811	1.52296	0.834412	2.72225	1.17041	0.0866508	0.468705	0.722937	0.606418	1.1684
SAP2	1	1.69593	0.183787	1.362	2.09024	0.618399	2.98667	0.935278	0.435029	0.354988	1.41132	0.91535	1.16899
HYR3	1	2.18492	0.202003	1.23325	2.5302	0.743234	3.65155	1.06619	0.745092	0.195727	1.42995	0.792213	1.475
QDR1	1	1.45	0.253421	1.32725	2.45258	0.761735	3.78258	1.35543	0.855513	0.4357	1.03572	0.75997	1.49641
IFF5	1	1.48303	0.2903	1.29283	1.97039	1.04005	3.26631	1.07787	0.975444	0.408096	1.23265	0.611925	1.14633
UEC1	1	2.24647	0.355987	1.4967	2.24766	0.948247	3.68276	1.32577	0.689386	0.362863	0.633325	0.688244	2.2657
PGA12	1	1.2459	0.229395	1.02795	2.68145	0.710884	3.99204	1.27999	0.477081	0.267213	1.30127	0.579755	1.75015
PGA16	1	1.81089	0.239764	1.08879	2.08145	0.812533	2.74434	0.802815	0.227654	0.317141	0.724575	0.464931	1.13498
PGA42	1	1.72917	0.149365	1.20272	2.12518	0.708291	3.72869	1.50747	0.598314	0.281401	0.924265	0.449609	0.811354
PGA50	1	1.66315	0.0947005	1.14356	2.56464	0.869973	4.18775	1.63827	0.331189	0.27477	1.06857	0.485597	1.07029
SPR1	1	1.47064	0.199304	0.894588	1.80473	0.721636	3.17657	1.14259	0.435289	0.383627	1.07071	0.763904	0.480758
PGA10	1	1.26943	0.503689	1.10862	1.97228	0.743518	2.90354	1.13892	0.226275	0.472221	1.23402	0.598321	1.55151
RME1	1	1.10049	0.397393	0.845272	1.74287	0.701808	2.39004	0.826894	0.305484	0.539643	1.11251	0.759367	1.49253
PGA28	1	0.926065	0.524516	1.00805	1.42596	0.607094	2.44964	1.41199	0.770364	0.50942	1.23017	0.708282	1.09002
PGA60	1	1.37131	0.29786	0.826364	1.90503	0.629976	2.72418	1.31577	0.776083	0.531277	1.10713	0.716595	1.51806
SAP3	1	1.01102	0.252446	0.955005	1.51389	0.799447	2.70284	0.9484	0.487114	0.585313	1.03318	0.67508	0.780572
PGA11	1	1.11123	0.284848	0.980803	1.51093	0.895883	2.71682	0.643811	0.534901	0.395173	0.489037	0.740003	1.14907
PGA22	1	0.959811	0.378932	1.03165	1.88415	0.745935	3.66116	0.495	0.399369	0.354836	1.31427	0.536398	1.32752
PGA46	1	1.37984	0.190544	0.873601	1.53517	0.767489	2.55679	1.24208	0.630221	0.499402	0.995492	0.646521	1.00711
orf19.4652	1	1.56175	0.10726	1.02143	2.11729	0.749963	3.11916	1.10976	0.330195	0.445717	1.07019	0.601732	0.781071
PGA49	1	1.01946	0.200409	0.704833	1.58837	0.911354	2.22134	0.956426	1.08982	0.411232	0.919467	0.612703	0.740153
IFF3	1	1.08482	0.165121	1.12986	2.44752	0.597025	3.39296	0.602225	0.171282	0.333909	1.01361	0.645336	1.95407
IFF4	1	0.930113	0.650114	1.18611	1.14546	0.799592	1.47268	1.02658	0.710766	0.775928	1.08169	0.875487	1.57796
orf19.6390	1	1.12853	0.191298	0.917277	2.68955	0.598774	3.9987	0.636697	0.202582	0.16816	0.62669	0.536574	1.08892
orf19.1691	1	0.76353	0.937857	1.05243	0.922514	0.847279	1.25018	0.49505	0.419188	0.843445	0.67269	0.609782	0.312205
RNR22	1	1.30414	0.96875	0.917966	0.768359	0.736971	1.30312	2.10469	3.24411	0.654379	1.35274	0.612604	1.21696
PGA48	1	0.933367	0.742115	1.35309	0.728641	0.863083	0.84367	2.80998	0.862625	0.954136	1.65582	0.754496	2.17839
orf19.5282	1	0.798294	0.756012	1.23934	0.876195	0.851635	0.687138	2.42333	1.32552	0.983553	1.38936	1.01751	2.18602
STF2	1	0.791446	0.625296	1.2284	0.66367	0.850979	0.625093	1.44419	0.975839	0.895113	1.04937	0.844066	1.98181
HSP104	1	0.604122	0.326262	0.914947	0.632093	0.745145	0.598581	1.48137	0.573282	0.902934	1.45896	0.989647	1.75069
orf19.449	1	0.851282	0.69306	1.14508	0.552058	0.694154	0.748836	1.24886	0.479571	0.828406	1.75079	0.883129	1.7588
orf19.5626	1	0.620479	0.908099	1.02857	0.462006	0.671129	0.593272	2.36249	0.57031	0.720325	1.58042	0.889201	1.58482
XYL2	1	0.870161	0.658187	0.974893	0.628983	0.808249	0.749764	0.867896	0.572837	0.801816	1.14591	0.80754	1.14557
PFK2	1	0.947883	0.94232	1.04781	0.895705	0.930839	0.86989	1.11102	1.35709	0.973263	1.19328	0.948605	1.21312
PFK1	1	1.06106	0.840444	1.11975	0.96989	0.883782	1.03613	1.40943	1.63987	0.845796	1.06213	0.816095	0.993727
GLK1	1	0.928694	0.809798	1.07122	0.838051	0.881726	0.928957	1.41113	1.53452	0.913086	1.09098	0.843874	1.60706
CPH2	1	0.994711	0.967406	1.23625	0.825084	0.799191	0.855808	2.01567	1.43327	0.820989	1.38837	0.933451	1.563
orf19.6578	1	1.00444	0.751929	1.21365	0.847677	0.778091	0.830971	1.21895	0.732924	0.788785	1.32602	0.928701	2.26914
GNP1	1	1.15483	1.01856	1.22642	0.908916	0.782936	1.10087	1.55456	1.42207	0.741226	1.58027	0.865323	1.57726
ADH1	1	1.2218	0.972826	1.24745	0.890898	0.794185	0.910509	1.26215	1.24303	0.836519	1.22802	0.739388	1.75575
TYE7	1	1.08653	1.39275	1.19819	0.965335	0.870204	1.5778	1.16262	1.14026	1.04966	2.13091	0.771936	1.55913
orf19.5334	1	0.831264	1.15941	1.18087	0.8187	0.831177	0.851316	1.08302	0.775136	0.997193	0.725313	0.721322	1.27698
KIP4	1	1.19182	0.939847	1.4437	0.829765	0.572797	0.862993	2.11756	0.719037	0.576065	1.52503	0.715705	0.92335
IHD1	1	1.26011	1.12559	1.8046	1.07771	0.784825	0.852834	2.99303	1.62567	0.769559	1.21967	0.883639	0.98425
YHB1	1	1.09117	1.33828	1.36981	1.00343	0.812947	1.03316	2.07108	0.750901	0.739276	1.8705	0.832338	3.4551
orf19.1862	1	0.877345	0.763974	0.916799	0.851459	1.08864	1.09281	1.65251	1.69411	1.04268	1.24972	1.02871	1.46194
PGA25	1	1.07202	0.452224	1.16514	2.10197	0.587457	3.25599	0.994656	0.748825	0.310736	0.915544	0.631339	0.790354
PGA17	1	1.01141	0.899717	1.51315	2.25067	0.806011	2.27133	1.27262	0.716671	0.551514	0.6139	0.82153	1.49273
SCW4	1	1.29069	0.557066	1.13495	2.66588	0.928476	3.56965	1.21152	0.830013	0.654837	1.25411	1.03963	0.84492
PGA45	1	2.29008	2.02132	1.77062	2.18811	0.905137	2.41801	1.11685	0.679831	0.878963	1.72338	1.04905	1.39686
zfu2	1	1.2527	0.992519	0.90855	0.991512	0.857769	1.4663	1.91363	1.16509	0.792472	1.40796	0.991759	0.95049
GPD2	1	2.10571	1.44313	1.44953	1.68069	1.20231	2.67638	0.982707	1.64621	1.21333	3.91127	0.930072	0.841275
NRG1	1	1.11286	1.42472	1.0577	1.01171	0.91754	1.39075	0.637748	0.712089	1.00269	1.89377	1.01109	1.1135
YWP1	1	0.911236	1.13568	0.636838	0.98826	1.08342	1.13836	0.0745069	0.191314	0.902878	0.923579	1.16941	1.03892
ENA2	1	1.37946	1.29352	0.97185	1.1342	1.05635	1.31442	1.26306	1.20646	1.18432	1.48315	0.999977	0.969237
orf19.3088	1	1.80693	1.59828	1.05479	1.35033	1.05635	1.67335	0.771543	0.780354	1.2156	2.1506	1.08306	1.19374
NOP7	1	1.47391	1.39105	1.07341	1.29498	1.09271	1.54678	0.747423	0.652704	1.22319	1.69267	1.15492	0.96758
ENA21	1	1.36437	1.65198	0.956533	1.09636	0.956664	1.43378	0.708896	0.836304	1.09639	1.61426	1.30938	0.922116
ZCF28	1	1.00242	0.869718	0.924391	1.1174	0.0887913	0.0897777	0.587072	0.409524	0.923368	1.00479	1.04544	0.860885
CAS5	1	1.11315	1.13131	1.09968	0.972117	0.834078	1.16236	0.869059	0.772433	0.841868	1.7918	1.09171	0.749731
GPD1	1	1.79709	1.17766	1.28297	1.45818	0.971876	1.89281	1.01932	2.42013	1.07272	1.88961	1.10406	0.92131
orf19.7091	1	1.30029	0.929272	1.38225	1.28852	0.805904	1.60399	0.968319	1.14185	0.977733	1.00541	0.959992	1.1744
orf19.409	1	1.17566	1.02727	1.35362	1.04244	0.930633	1.36778	0.976763	0.917482	1.07322	1.63536	0.950346	1.29303
orf19.2529	1	1.40429	0.965744	0.92661	1.24357	1.03781	1.67967	1.16295	1.33468	1.05265	0.95651	0.993577	1.50805
TPK1	1	1.24075	0.979274	0.977105	1.09981	0.965224	1.65866	0.519726	0.370892	1.07231	2.20264	1.10399	1.1619
ALS5	1	1.21368	0.999917	1.00071	1.13865	0.977619	1.28743	1.36353	1.22166	0.864053	1.30383	1.09527	1.13432
SMF3	1	1.08662	1.05427	1.01196	1.0757	0.959124	1.12847	1.12943	1.23972	0.891425	0.970617	0.902233	1.08455
ALS2	1	1.24871	1.08853	0.994348	1.24271	0.9522	1.41451	1.27396	1.71044	0.885215	1.52503	1.07122	1.01455
SKO1	1	1.23291	0.821867	1.11487	1.23876	0.893527	1.54347	0.914773	0.808187	0.86263	0.97913	1.01077	1.13052
VPS28	1	1.02924	0.912682	1.09438	1.01557	0.985718	1.32457	0.9863	0.672236	0.936518	1.05838	0.996084	0.915809
ALS9	1	0.976098	0.719065	0.952051	1.11581	0.902744	1.28505	1.01398	1.85831	0.857298	1.05395	0.994095	1.00707
TRR1	1	1.02721	1.06813	1.15715	1.06867	1.03818	1.12406	0.977918	1.24631	1.05734	1.01339	1.04734	0.889166
KGD1	1	1.03481	1.1345	1.11152	1.02669	0.9813	0.990769	0.947433	1.70198	1.0819	1.04631	1.02193	1.12475
orf19.4623	1	1.08678	1.16658	1.04418	0.987791	0.94944	1.02285	0.849717	0.687603	0.979569	1.16515	1.01534	1.06233
ERG6	1	1.05343	1.0298	1.11736	1.08016	0.993819	1.03593	0.582851	0.341431	0.977295	1.07066	1.06373	0.766353
PMT1	1	0.903357	1.01654	1.03143	0.96403	0.95261	0.925827	0.729734	0.646448	0.951274	0.885518	0.979062	0.855939
PMT4	1	0.881752	1.03819	1.00019	0.973895	0.985978	1.05076	0.861708	0.947733	0.945753	0.876065	1.02562	0.96143
TRX1	1	0.845525	1.00293	0.90279	0.878362	1.06854	1.20923	0.740609	1.03923	1.1227	0.947704	0.993736	1.05075
HSP90	1	0.891741	0.850407	0.913977	0.883358	0.918792	0.922912	0.931335	0.742759	1.03189	1.0176	1.04255	0.946427
FBP1	1	1.00883	1.08741	0.961615	0.908718	0.99045	1.11265	1.89029	6.87155	1.10895	1.0725	1.00122	1.5178
orf19.3460	1	0.843735	0.625586	1.03722	1.03124	0.825488	1.18076	1.63511	1.45434	0.714401	0.958306	1.01331	0.779645
MET10	1	1.24218	1.06445	0.85573	1.01936	1.01288	1.39941	0.596014	0.771109	0.969238	1.05075	1.06426	0.88137
ARO9	1	0.946509	0.876938	1.24061	0.820168	0.821147	0.988813	1.11306	0.981476	0.956622	0.828964	1.0047	0.634824
RBD1	1	1.06026	0.993192	1.13635	1.07157	1.0661	1.16276	1.0259	0.923846	0.796639	1.1129	1.05302	1.10096
CRZ1	1	1.04401	0.8494	1.09342	1.18073	0.963267	1.28618	1.00197	1.07483	0.873362	1.08075	1.02826	0.845897
DFG5	1	1.13969	0.888325	1.1799	1.08491	0.870809	1.19559	1.00237	0.986765	0.828124	1.12225	0.957771	0.903046
UTR2	1	1.08412	0.962655	1.17406	0.963855	0.888324	1.13414	1.17516	1.01721	0.85863	1.27261	1.04409	1.00011
EAP1	1	1.37924	0.85782	1.1684	1.25028	0.968459	1.51918	5.89834	3.03963	0.822091	1.11591	0.96101	1.09938
GCN4	1	1.10415	0.852676	1.06372	1.37246	0.997476	1.08142	1.91464	2.53934	0.928789	0.930345	1.10186	1.0628
FGR6-4	1	0.964357	0.709735	0.946633	1.05733	1.03421	1.15402	1.02789	0.791644	0.955933	0.775715	1.09093	0.735814
orf19.1424	1	1.19297	0.854345	1.13829	1.08213	1.10939	1.11354	1.16954	0.907098	1.03054	1.06815	1.12125	1.01586
PGA33	1	1.04731	0.954167	1.08172	1.0395	1.10497	1.02966	1.25137	1.12872	1.11259	1.02753	1.07508	0.8884
PGA1	1	1.05511	0.934501	1.0781	1.0504	1.07841	1.20514	1.23441	1.25474	1.0291	1.09173	1.04261	1.81654
PGA62	1	0.874427	0.823711	1.03677	0.944087	0.910354	0.837887	0.775486	0.806147	0.976185	1.23553	0.998449	0.968062
GIN4	1	1.22569	1.07898	1.10707	1.0875	0.9945	1.09206	0.91808	0.688375	1.02129	1.13996	1.18876	0.881775
RLM1	1	0.998754	0.990285	1.12158	1.00217	0.953006	1.03183	1.01199	0.841402	0.879945	1.33629	1.156	1.00714
GSC1	1	1.21082	1.12176	1.05375	1.02661	1.00643	1.20135	1.05648	1.11062	0.960456	1.38053	1.10017	0.886594
orf19.6756	1	1.04065	0.939729	1.08839	1.03336	1.01884	1.11713	1.15687	0.897613	0.96293	1.00525	1.03293	1.02638
ZCF8	1	1.03006	0.891888	1.06416	1.06949	0.933719	0.999224	0.94738	0.739089	0.900113	0.886776	1.07373	0.746036
SSR1	1	0.870332	0.910299	1.11254	0.926148	0.913962	0.861798	1.01515	1.00742	0.951816	1.05765	1.01695	0.850621
orf19.206	1	1.11964	0.925198	0.916777	1.05687	0.987623	1.28394	0.909532	0.80132	0.884489	1.03106	0.983708	1.02327
TOR1	1	0.985646	1.04145	0.989226	1.02829	0.920778	1.14169	1.09841	1.05514	1.00641	1.12627	1.02674	0.985251
IRE1	1	0.9741	0.799804	1.03789	0.925922	0.897367	0.926571	1.2125	0.838375	0.84836	1.06534	1.05146	1.14472
VPS17	1	1.02094	0.958101	0.908096	1.01819	0.9897	1.10985	1.01461	0.948219	0.962727	0.966371	1.03148	0.822899
GPI8	1	1.20421	0.932516	1.21534	1.1897	0.99258	1.23168	0.885538	0.837819	0.935723	0.837116	1.04558	0.9004
GPI19	1	0.973345	0.822454	0.988337	1.07165	1.0315	1.02343	0.982673	0.93322	0.95841	0.795211	1.11557	0.779753
orf19.5401	1	1.22619	0.87387	1.05791	1.05614	1.01673	1.47139	1.05684	0.829629	0.889959	1.14204	1.07308	1.19332
RBR3	1	1.18833	1.03166	1.01954	1.00361	1.05898	1.55027	0.96135	1.08216	0.839497	1.14037	1.06815	1.06467
orf19.4014	1	1.04546	1.09962	1.13996	1.01608	1.00689	1.2429	1.21668	0.729553	1.03442	1.24087	1.09211	1.13664
MID1	1	1.16607	0.939535	1.0777	1.04169	1.00409	1.11173	1.05836	0.836644	0.932531	1.09448	1.08949	1.03953
orf19.4292	1	1.16281	1.08962	1.07163	1.21869	0.957298	1.43419	1.11938	0.788161	1.01947	1.24568	1.05961	0.840351
DCW1	1	0.97233	0.978072	1.12049	1.06645	1.02178	0.920038	0.842313	0.88645	0.998524	1.00753	1.08998	0.836311
PGA63	1	0.901181	1.1296	1.00314	0.976629	1.03171	0.854808	0.969956	0.831577	1.03261	0.996472	1.01976	0.925994
HOG1	1	1.03546	1.11289	0.991881	0.986848	1.02453	1.05559	1.07172	1.02944	1.1102	1.07719	1.05683	0.853504
TUP1	1	0.923075	1.0645	0.998694	0.930272	1.02541	0.860092	0.955198	0.84802	1.1159	1.02887	1.0489	0.927402
CBK1	1	1.11347	0.993169	0.984304	1.13654	1.05549	1.13194	0.801117	0.825229	0.910921	1.0773	1.1219	0.946382
SSK2	1	0.966131	0.99555	1.05098	0.960902	1.00487	0.984372	1.01357	0.787286	0.965865	1.02973	1.12901	0.89606
orf19.2677	1	1.05619	1.11608	1.01623	1.01528	0.975327	1.03232	1.06179	1.02521	0.907282	1.00301	1.05699	0.952825
ERG25	1	1.46979	1.05985	1.1197	1.32866	1.02649	1.44948	0.780856	0.702198	1.05542	1.53648	1.04923	1.1341
CNB1	1	1.03605	1.17279	1.01708	1.00862	1.07057	1.36944	1.04477	0.890601	1.10536	1.02728	1.02354	0.852759
orf19.5693	1	1.00914	1.21562	0.970963	0.97973	1.1222	0.968646	0.952143	0.825075	1.12667	1.08026	1.111	0.959414
orf19.2411	1	1.15013	0.92026	1.04565	1.10319	0.978728	1.4751	0.871168	0.896505	0.986892	1.32214	0.919479	1.51094
HYR4	1	1.30586	0.854673	1.15822	1.27579	0.903645	1.52349	1.02506	1.013	0.915691	0.91124	1.01459	1.44722
PGA27	1	1.40874	0.97177	1.22599	1.62988	0.945678	2.17021	1.1065	0.894395	0.688396	1.08151	0.989236	1.3524
GSL1	1	1.08657	0.798202	0.968781	1.36895	0.958429	1.80702	1.18573	0.93787	0.834969	0.985757	0.928324	0.757326
orf19.4174	1	1.04636	0.930804	1.08008	1.08752	0.977948	1.48037	1.03718	0.908247	0.780478	1.0695	0.973051	0.948874
PGA55	1	1.37941	0.957219	1.02253	1.1275	0.94467	1.90541	1.08291	0.954117	0.904826	1.3122	1.11168	1.42012
SPT14	1	1.01279	1.04691	1.07571	1.16206	1.0257	1.23165	1.41192	1.06204	1.18367	1.08466	1.15289	1.51408
MKC1	1	1.00241	0.998351	0.950515	1.03221	1.04804	0.999376	1.17926	1.13746	1.06182	0.877444	1.11548	1.48247
GPI2	1	1.03516	1.01598	1.11943	1.1498	0.946197	1.06949	1.11618	0.93987	1.00322	1.07851	1.01688	1.28169
orf19.2529.1	1	1.59378	1.28123	1.1565	1.03921	0.87016	1.64993	1.4465	0.663603	0.998886	2.74277	0.848858	2.47692
PGA43	1	1.02199	0.892974	1.0689	1.23748	1.07707	1.38173	1.33503	1.20306	1.01827	0.716354	0.984202	1.14929
CDR2	1	1.23523	0.977983	1.15843	1.19035	1.01267	1.57116	0.969675	1.00888	0.916753	1.04789	1.13901	0.993147
orf19.2030	1	1.12779	0.979714	1.1508	0.897866	0.981073	1.28053	1.21659	1.02455	1.0143	1.42775	1.01653	1.33527
PGA52	1	1.19085	1.07843	1.12563	1.15133	0.932831	1.18158	1.09495	1.03986	0.979239	1.29792	0.990225	1.00746
SAP9	1	1.22084	1.07619	1.04047	1.06037	0.915918	1.14246	1.13431	1.3741	0.957369	1.65031	1.03621	1.74394
PIN3	1	1.18984	1.02558	1.17288	1.02313	0.889012	1.07645	1.44463	1.42917	1.00641	1.41308	1.04374	1.10944
UGP1	1	0.84812	0.968978	1.11556	0.958607	0.930022	0.914119	1.28975	1.07119	0.942343	1.02373	0.959745	1.0606
CHS1	1	1.00702	0.936024	1.05707	0.999423	0.989141	0.955318	0.825612	0.524103	0.907108	1.01005	0.974739	0.896155
ERG11	1	1.2144	1.18284	1.29057	1.19819	0.921903	1.27704	0.975612	0.697889	0.859901	1.11648	0.957655	1.11597
DAK2	1	0.946988	1.19097	1.06889	0.902902	0.935964	0.944897	1.78188	1.99902	0.970424	1.14851	0.939951	1.073
PGA4	1	0.961412	0.999312	2.47833	1.66782	0.881697	0.74622	1.42975	0.83213	0.93957	1.20291	0.929168	1.39659
CHK1	1	1.02262	1.02831	1.01194	0.864661	0.920015	1.23302	2.00316	1.44979	0.972535	1.70405	1.17909	0.985591
MAE1	1	1.06255	1.63215	1.14782	0.991606	0.938385	1.03625	2.28732	1.40376	1.11863	0.988168	1.01856	1.08298
orf19.1212	1	0.998699	0.598208	1.09061	1.04937	1.00559	1.07179	1.43964	1.28724	0.982296	0.730832	0.900043	0.964356
PGA59	1	0.943241	0.7528	1.09015	0.856893	0.775435	0.837857	0.840495	0.642813	1.09603	1.11587	0.776747	1.20163
GPI1	1	1.1362	0.956797	0.842947	1.01222	0.99884	1.12398	1.33395	1.04918	0.899447	0.953133	0.94007	0.875558
PGA56	1	1.01195	1.01657	1.15888	1.01935	0.970158	1.06299	1.16082	0.956705	1.10382	1.17342	0.966808	1.01787
orf19.5455	1	1.11856	1.29879	1.15694	1.02598	1.01412	1.07637	0.577309	0.442804	1.03554	1.33045	0.978106	0.799872
orf19.6329	1	0.908254	0.861371	1.09105	1.10106	0.943536	1.19284	1.12795	0.968142	0.873191	0.974332	0.847774	0.862963
PGA32	1	1.62619	1.13875	1.44643	1.43109	0.830526	1.81763	1.03945	0.591096	0.814231	1.29219	0.871202	1.20362
PLB3	1	1.099	0.940705	1.27506	1.02733	0.817824	1.08757	1.06535	0.639719	0.851982	1.32629	0.947791	1.84725
RFG1	1	0.940451	0.868558	1.06432	0.890032	0.859913	0.873605	0.970089	0.794782	0.754124	1.14097	1.00297	1.31061
CAP1	1	0.923177	0.798707	0.956021	0.9099	0.894842	0.888741	1.26288	1.14733	0.954763	1.06082	1.07814	1.16198
FLO8	1	1.00487	0.890806	1.00356	0.897894	0.880746	0.953597	1.30155	1.00992	0.835596	1.27873	1.07204	0.868411
SSK1	1	1.06205	0.896665	1.13934	0.94452	0.852065	1.13679	1.31309	1.04101	0.912373	1.59397	0.988971	0.84088
YAK1	1	0.875143	0.80608	1.1484	0.843731	0.800597	0.859674	1.11841	0.803395	0.77584	1.30442	0.973071	1.32406
UPC2	1	1.04664	0.93561	0.981695	1.0179	0.908993	0.988556	0.951718	0.62894	0.849836	1.01076	1.00831	1.10104
ALS6	1	1.06698	0.999842	0.920777	1.15075	0.846894	1.61841	1.00981	0.777375	0.970516	1.18418	1.02283	0.94465
ALS7	1	1.01983	0.976034	0.891662	1.10636	0.955979	1.37373	0.741818	0.686274	0.855926	1.27153	1.02384	1.18526
IFF6	1	0.918724	0.880098	0.798486	1.01755	0.914774	1.33589	0.993597	0.810273	0.68024	0.967979	1.04611	1.01031
CPH1	1	1.09211	0.810253	1.47461	1.38015	0.914919	1.52065	1.12859	0.789886	0.662256	0.911908	0.98736	1.14196
CDR1	1	1.04325	0.989286	0.950286	0.919116	0.901022	1.14579	0.631154	0.580203	0.924903	1.43949	1.06651	0.836285
ECM33	1	0.925833	0.90843	1.15073	0.865882	0.82659	0.801293	1.05778	0.845965	0.829281	0.89328	0.861645	0.865196
SGA1	1	0.852361	0.842503	1.15679	0.858662	0.845998	0.783639	1.08121	0.82356	0.816932	0.946705	0.946712	0.917432
ERG1	1	1.10968	1.13458	1.24997	0.988979	0.908194	1.07402	1.39709	0.892986	0.882857	1.0776	0.884564	0.952252
EFG1	1	1.10973	0.983414	1.02032	1.02767	0.891721	0.898971	1.11879	0.993714	0.915147	1.29574	1.07745	1.41948
ERG3	1	1.11293	0.990298	1.43288	1.16758	0.798682	1.10028	1.1042	0.813025	0.77221	1.28347	0.917087	0.780668
SUN41	1	1.07285	0.989229	1.3565	0.949426	0.799457	0.855463	1.89702	1.14735	0.6818	1.1663	0.938852	1.21205
PHR1	1	1.15793	0.997352	1.31557	1.01507	0.810105	0.9826	1.31864	1.04961	0.78376	1.16033	0.850494	1.09394
BCR1	1	1.00513	0.831025	1.08519	1.08876	0.950571	1.03993	1.13595	0.840166	0.862438	1.16062	1.05217	1.30962
ARO8	1	0.761184	0.934857	1.79244	1.48425	1.05571	0.879656	1.06082	1.42241	1.06412	0.829117	1.28847	1.01636
CIT1	1	0.73707	0.87352	0.969397	0.93242	1.03754	0.805668	0.648704	0.754897	1.10423	0.788854	1.14143	1.84957
KRE1	1	1.15813	0.57673	1.08639	1.10185	1.0204	0.942245	1.41868	1.03165	0.962611	1.58792	1.1052	1.7692
ARG81	1	1.08002	0.901709	0.0358992	0.0220121	0.929383	1.03203	1.01815	0.652735	0.88914	1.10057	1.1748	1.21379
orf19.4706	1	1.41279	0.963252	1.19431	1.25597	0.910254	1.50741	1.49685	1.56714	0.95433	1.549	0.984015	1.26176
RBR2	1	0.938728	1.03273	0.827756	1.03363	0.998724	1.28565	0.57206	0.543269	0.846662	0.972284	1.059	1.7312
TPO3	1	1.26889	1.05407	0.877528	1.17418	0.973017	1.43643	0.825056	2.58239	1.0842	1.16542	0.896403	1.14806
orf19.6660	1	1.50982	0.801397	1.02976	1.21016	1.0456	2.19922	1.06886	2.04661	1.07198	2.88468	0.971773	0.873941
STP4	1	1.10008	0.688486	1.22407	1.03264	0.938922	1.31643	0.792982	0.969816	1.02122	1.99594	1.02797	1.22305
orf19.675	1	1.00421	0.648322	1.23002	1.01384	0.879273	1.00902	0.90321	0.627725	0.989834	1.16386	0.831417	0.974552
orf19.2049	1	0.81093	0.75439	0.635707	0.875666	0.972194	1.40673	0.565544	0.260877	0.782216	0.737059	1.00992	0.954316
CZF1	1	1.05224	0.926484	1.12479	1.07463	0.892268	1.31068	1.31796	1.05402	0.955178	1.54044	1.07963	1.18508
SAP10	1	1.42957	0.936181	1.18578	1.84781	1.00147	2.25614	1.31999	2.19261	0.969554	1.98174	0.95103	0.871417
PGA6	1	0.989164	0.986372	1.14589	0.961713	0.906755	0.895956	0.528047	0.521107	0.86433	0.852678	0.95301	0.598037
CHT1	1	0.98008	0.746471	0.942194	1.10464	0.787944	1.20871	0.596917	0.717554	0.671764	0.688515	0.846091	0.992873
PGA54	1	0.813027	0.974903	1.25171	0.720568	0.656983	0.635866	1.48552	0.654228	0.502229	1.01471	0.943769	0.859918
orf19.6816	1	0.847797	0.867803	0.674438	0.846425	1.05201	1.00941	1.0927	2.84078	1.1416	0.904975	1.016	0.963427
RCT1	1	0.872771	0.879611	1.14521	0.991163	1.03004	0.953637	0.984968	1.13704	1.0475	0.954102	0.963454	0.541607
PLB5	1	1.16495	0.650698	1.24145	1.02518	0.968784	1.23123	1.39977	0.844472	0.824151	1.00884	0.876018	0.630638
HTA2	1	0.883636	1.08321	1.09391	1.02385	1.18852	0.979072	0.562893	0.369323	1.2863	0.932983	1.01117	0.705255
PGA14	1	1.00219	1.08879	1.1117	0.942524	1.11135	1.01075	0.798468	0.823353	1.2814	1.06111	1.00435	0.840112
PGA53	1	0.925538	1.16498	0.995497	0.991762	1.06994	0.976635	0.633211	0.645457	1.20387	1.15299	1.10018	0.833402
PIL1	1	0.792833	0.969305	0.935186	0.859	1.02278	0.815287	0.860482	0.619548	1.05295	1.11443	0.892666	0.585842
HSP70	1	0.789788	0.714458	0.827129	0.830063	0.929294	0.848187	0.92808	0.832809	0.958957	1.02723	1.13586	0.932736
YCK3	1	1.08984	1.01669	0.994003	1.00828	1.01604	1.03624	0.868625	0.757156	0.956948	1.12164	1.09803	0.834046
PDR16	1	1.20838	0.82012	0.975993	1.04645	0.95749	1.01782	0.806789	1.27859	0.929496	0.924281	1.07673	0.779406
TPK2	1	0.853911	0.89107	0.943255	1.04219	1.01048	0.946135	0.945967	0.908711	0.922686	0.878382	1.03875	0.702199
SNF5	1	1.08123	0.983844	1.08641	1.25582	1.04948	1.23116	0.905283	0.868389	1.03227	0.976963	1.11286	0.953325
CAT1	1	1.22603	1.24357	0.853869	1.02162	0.983661	0.928502	0.737169	0.913512	0.974364	1.31862	1.11011	1.6472
AOX1	1	0.974603	0.817182	0.865862	1.02379	0.944503	1.23542	0.914845	1.1163	1.0909	1.03105	1.02996	0.803192
GCA2	1	0.90409	0.828213	0.927309	0.83796	0.920164	1.1251	0.605687	0.419184	0.854398	1.07232	1.03224	1.17659
PLB4.5	1	1.08028	1.02155	1.2809	1.31129	1.00867	1.32354	0.533027	0.28994	0.907465	1.03485	1.21155	0.890286
orf19.2125	1	0.934638	0.968865	0.903513	1.02101	1.18554	1.36789	1.6337	1.76211	1.27495	1.09821	1.25158	1.48517
SOD4	1	0.481964	0.829679	0.916924	0.853412	1.28701	0.815725	0.884601	0.659131	1.17821	0.472751	1.8797	0.492159
ALS4	1	0.889871	1.17379	0.556373	1.15736	1.60356	1.36024	0.591646	1.25398	1.63019	1.54366	1.58778	0.283831
